# Supplementary material
Source: Research Square preprint supplement (doi:10.21203/rs.3.rs-8969482/v1)
Supplement: Supplementary file 1 [file 0b667f681334b784be1eb258.docx]

| Table S1 Spearman Correlation between CI and baseline parameters, visual function and biometric parameters | | | | | | | | | | |
| --- | --- | --- | --- | --- | --- | --- | --- | --- | --- | --- |
|  | LogMAR | SER | NRA | subjective phoria in far | objective phoria in far | Convergence | AC/A | AL | ACD | WTW |
| R | 0.24 | -0.05 | -0.13 | -0.26 | -0.25 | -0.15 | -0.28 | 0.11 | 0.15 | 0.24 |
| p | 0.00 | 0.50 | 0.05 | 0.00 | 0.00 | 0.02 | 0.00 | 0.24 | 0.02 | 0.00 |

| Table S2 Spearman Correlations of Axial Elongation in 12m-follow-up with Baseline, Visual Function, and Biometric Parameters. | | | | | | | | | | |
| --- | --- | --- | --- | --- | --- | --- | --- | --- | --- | --- |
|  | LogMAR | SER | NRA | subjective phoria in far | objective phoria in far | Conver  gence | AC/A | ACD | WTW | CI  Y/N |
| R | 0.06 | -0.04 | -0.26 | -0.10 | -0.07 | -0.20 | -0.32 | 0.33 | 0.36 | 0.19 |
| p | 0.42 | 0.51 | 0.00 | 0.11 | 0.32 | 0.00 | 0.00 | 0.00 | 0.00 | 0.00 |
