# Supplementary material
Source: Research Square preprint supplement (doi:10.21203/rs.3.rs-8969482/v1)
Supplement: Supplementary file 2 [file 172b650751a87c30a5a07bad.docx]

| Table 1. Baseline characteristics of subjects in CI and normal | | | |
| --- | --- | --- | --- |
| Variables | CI (n = 50) | Normal (n = 194) | *p* |
| Age, y | 15.19 ± 0.44 | 15.28 ± 0.47 | 0.21 |
| SER, D | 0.54 ± 0.53 | 0.46 ± 0.43 | 0.28 |
| LogMAR | 0.15 ± 0.08 | 0.15 ± 0.08 | 0.60 |
