# Supplementary material
Source: Research Square preprint supplement (doi:10.21203/rs.3.rs-8969482/v1)
Supplement: Supplementary file 3 [file 9439d4f05b94ff773d2a7e88.docx]

| Table 2. characteristics in accommodation and binocular visual function CI | | | | |
| --- | --- | --- | --- | --- |
|  | Variables | CI (n = 50) | Normal (n = 194) | *p* |
| Accommodation function | NRA, D | 2.04 ± 0.37 | 2.17 ± 0.35 | 0.02 |
| PRA, D | -2.88 ± 0.97 | -2.99 ± 0.83 | 0.41 |
| AMP, D | 10.81 ± 2.17 | 11.26 ± 2.23 | 0.19 |
| AF, cpm | 7.99 ± 4.19 | 8.49 ± 4.04 | 0.45 |
| BCC, D | 0.00 ± 0.46 | 0.06 ± 0.36 | 0.35 |
| Binocular visual function | subjective phoria in far, ° | -1.02 ± 2.06 | 0.33 ± 2.07 | 0.00 |
| objective phoria in far, ° | -0.85 ± 1.94 | 0.42 ± 2.08 | 0.00 |
| divergence, ° | -6.65 ± 1.67 | -6.99 ± 1.84 | 0.24 |
| convergence, ° | 13.50 ± 6.51 | 16.83 ± 7.99 | 0.00 |
| AC/A | 2.67 ± 1.62 | 3.64 ± 1.53 | 0.00 |
