# Supplementary material
Source: Research Square preprint supplement (doi:10.21203/rs.3.rs-8969482/v1)
Supplement: Supplementary file 4 [file aa293631ea75913582ee430d.docx]

| Table 3. Changes in Ocular Biometric Parameters in CI and normal Groups | | | | | | |
| --- | --- | --- | --- | --- | --- | --- |
|  |  | Base line | 3-month follow up | 9-month follow up | 12-month follow up | *p* | |
| K, D | CI (n = 50) | 42.13 ± 1.16 | 42.21 ± 1.15 | 42.15 ± 1.17 | 42.19 ± 1.17 | 0.99 | |
| Normal (n = 194) | 42.50 ± 1.33 | 42.54 ± 1.32 | 42.53 ± 1.34 | 42.55 ± 1.33 | 0.98 | |
| *p* | 0.76 | 0.11 | 0.06 | 0.07 |  | |
| AL, mm | CI (n = 50) | 24.02 ± 0.70 | 24.08 ± 0.72 | 24.13 ± 0.74 | 24.18 ± 0.75 | 0.73 | |
| Normal (n = 194) | 23.83 ± 0.68 | 23.88 ± 0.70 | 23.91 ± 0.70 | 23.93 ± 0.72 | 0.45 | |
| *p* | 0.73 | 0.07 | 0.05 | **0.04** |  | |
| ACD, mm | CI (n = 50) | 3.52 ± 0.33 | 3.54 ± 0.33 | 3.51 ± 0.37 | 3.52 ± 0.35 | 0.98 | |
| Normal (n = 194) | 3.38 ± 0.39 | 3.40 ± 0.39 | 3.33 ± 0.39 | 3.34 ± 0.39 | 0.32 | |
| *p* | **0.01** | **0.01** | **0.00** | **0.00** |  | |
| LT, mm | CI (n = 50) | 3.55 ± 0.19 | 3.56 ± 0.21 | 3.56 ± 0.25 | 3.56 ± 0.21 | 0.99 | |
| Normal (n = 194) | 3.55 ± 0.20 | 3.55 ± 0.20 | 3.54 ± 0.20 | 3.55 ± 0.19 | 0.94 | |
| *p* | 0.90 | 0.51 | 0.63 | 0.70 |  | |
| CCT，μm | CI (n = 50) | 549.28 ± 39.45 | 552.14 ± 38.76 | 554.60 ± 40.99 | 551.92 ± 38.15 | 0.93 | |
| Normal (n = 194) | 555.99 ± 33.67 | 556.15 ± 40.52 | 559.18 ± 33.58 | 556.83 ± 34.23 | 0.80 | |
| *p* | 0.23 | 0.53 | 0.41 | 0.38 |  | |
| WTW，mm | CI (n = 50) | 12.22 ± 0.37 | 12.24 ± 0.39 | 12.27 ± 0.43 | 12.25 ± 0.37 | 0.96 | |
| Normal (n = 194) | 11.96 ± 0.49 | 11.99 ± 0.47 | 12.05 ± 0.43 | 12.02 ± 0.42 | 0.24 | |
| *p* | **0.00** | **0.00** | **0.00** | **0.00** |  | |
| AL/CR | CI (n = 50) | 3.00 ± 0.06 | 3.01 ± 0.06 | 3.02 ± 0.06 | 3.02±0.06 | 0.28 | |
| Normal (n = 194) | 3.00 ± 0.06 | 3.01 ± 0.06 | 3.01 ± 0.06* | 3.02 ± 0.06* | **0.04** | |
| *p* | 0.88 | 0.83 | 0.92 | 0.63 |  | |
