# Supplementary material
Source: Research Square preprint supplement (doi:10.21203/rs.3.rs-8969482/v1)
Supplement: Supplementary file 5 [file da0fb4e4d1190046d4e7bcc3.docx]

| Table 5．proportion of participants with varying degrees of AL change at the 12-month follow-up | | | |
| --- | --- | --- | --- |
|  | AL growth at 12-month follow-up n (%) | | |
| ＜0.1mm | 0.1~0.2mm | ≥0.2mm |
| CI | 16 (32.00) | 17 (34.00) | 17 (34.00) |
| Normal | 103 (53.09) | 54 (27.84) | 37 (19.07) |
|  | 8.15 | | |
| *p* | **0.02** | | |
