# Supplementary material
Source: Research Square preprint supplement (doi:10.21203/rs.3.rs-8969482/v1)
Supplement: Supplementary file 6 [file e096c4a637c35202193e6342.docx]

| Table 4. Change in AL and AL/CR in CI and normal group | | | | |
| --- | --- | --- | --- | --- |
|  |  | CI (n = 50) | Normal (n = 194) | *p* |
| Change in AL, mm | 3m-follow up | 0.06 ± 0.07 | 0.05 ± 0.14 | 0.07 |
| 9m-follow up | 0.11 ± 0.10 | 0.08 ± 0.14 | 0.18 |
| 12m-follow up | 0.16 ± 0.12 | 0.11 ± 0.16 | **0.02** |
| Change in AL/CR | 3m-follow up | 0.01 ± 0.02 | 0.01 ± 0.02 | 0.31 |
| 9m-follow up | 0.01 ± 0.02 | 0.01 ± 0.02 | 0.47 |
| 12m-follow up | 0.02 ± 0.02 | 0.02 ± 0.02 | 0.08 |
